1 **Title page**

2 Title

3 Prevalence and risk factors of self-reported hearing and balance dysfunction in a population-based  
4 sample from rural northeastern Germany

5

6 Short running title: Prevalence of hearing and balance dysfunction

7

8 Authors

9 Friedrich Ihler<sup>1</sup>, Tina Brzoska<sup>1</sup>, Reyhan Altindal<sup>1</sup>, Oliver Dziemba<sup>1</sup>, Henry Völzke<sup>2</sup>, Chia-Jung  
10 Busch<sup>1</sup>, Till Ittermann<sup>2</sup>

11 1: Department of Otorhinolaryngology, Head and Neck Surgery, University Medicine Greifswald,  
12 17475 Greifswald, Germany

13 2: Institute for Community Medicine, University Medicine Greifswald, 17475 Greifswald, Germany

14

15 Conflicts of Interest and Source of Funding

16 The authors did not receive payment or support in kind for any aspect of the submitted work.

17 The Study of Health in Pomerania (SHIP) is part of the Community Medicine Research Network of  
18 the University of Greifswald, which is supported by the Ministry of Cultural Affairs as well as the  
19 Social Ministry of the German Federal State of Mecklenburg-Vorpommern. SHIP was also funded by  
20 the German Federal Ministry of Education and Research (BMBF) with the grant numbers: 01 ZZ  
21 9603, 01 ZZ 0103, 01 ZZ 0403, and 01 ZZ 0701.

22

23 Corresponding author

24 Friedrich Ihler, MD

25 Department of Otorhinolaryngology, Head and Neck Surgery

26 Greifswald University Medicine

27 Fleischmannstrasse 8

28 17475 Greifswald

29 Germany

30 Telephone: +49 3834 86 6294 (office), +49 3834 86 6202 (department)

31 Facsimile: +49 3834 86 6201

32 [friedrich.ihler@med.uni-greifswald.de](mailto:friedrich.ihler@med.uni-greifswald.de)

33

34 Metadata

35 Word count structured abstract: 354

36 Word count introduction to conclusion: 5150

37 Number of figures: 3

38 Number of tables: 2 (+ 2 Supplemental tables)

39

40 Abstract

41 Objectives. A close anatomical and physiological relationship is known between the senses of hearing  
42 and balance, while an additional pathophysiological interaction is supposed. The pathophysiological  
43 mechanisms underlying this association are not fully understood, especially in individuals without a  
44 known specific otologic disorder. Therefore, further insight is required into the prevalence of the  
45 audiovestibular symptoms hearing loss, tinnitus and dizziness as only scarce information on the  
46 combined occurrence is available so far. Additionally, the influence of potential risk factors from  
47 lifestyle habits as well as cardiovascular and metabolic conditions on the development of those  
48 symptoms should be studied.

49 Design. To evaluate the prevalence of self-reported hearing loss, tinnitus and dizziness in two separate  
50 population-based samples from Western Pomerania, a rural region of north-eastern Germany. Datasets  
51 from 8134 individuals aged 20 to 79 years were available from the baseline investigations of the  
52 cohorts START and TREND of the Study of Health in Pomerania (SHIP). Audiovestibular symptoms  
53 were assessed by structured questionnaires. The cohorts were comprehensively characterized  
54 regarding modifiable lifestyle factors as well as cardiovascular and metabolic disorders, allowing the  
55 assessment of the role of those influencing factors.

56 Results. We observed a weighted prevalence of 14.2% for hearing loss, 9.7% for tinnitus and 13.5%  
57 for dizziness in the population. The prevalence increased with age and differed among the sexes. A  
58 relevant subgroup of 28.0% of affected individuals reported more than one symptom. The prevalence  
59 of hearing loss as well as tinnitus increased between the two cohorts. A moderate positive correlation  
60 was found between hearing loss and tinnitus (phi-coefficient 0.318). In multivariable regression  
61 analyses, education was identified as a significant protective factor while only smoking was  
62 significantly associated with all three symptoms. Furthermore, several cardiovascular risk factors  
63 contributed to both hearing loss and dizziness.

64 Conclusions. Audiovestibular symptoms are highly prevalent in the general population. A  
65 considerable but complex influence of risk factors points towards a relation with neuronal as well as  
66 cardiovascular disease processes. To clarify the underlying mechanisms, the interaction between the  
67 senses of hearing and balance as well as the mode of action of the risk factors should be evaluated in  
68 more detail in the future.

## 69 **Introduction**

70 The inner ear houses both the auditory sensory organ and the vestibular labyrinth, contributing to the  
71 senses of hearing and balance. Hearing loss, tinnitus, and dizziness are prevalent symptoms of  
72 auditory and vestibular dysfunction, affecting significant proportions of populations. Hearing loss is  
73 estimated to affect up to 19.3 % (GBD 2019 Hearing Loss Collaborators 2021), tinnitus up to 42.7%  
74 (McCormack et al. 2016) and dizziness up to 30% (Murdin & Schilder 2015) of the global population.

75 When assessing hearing loss, self-report as well as structured questionnaires or pure tone audiograms  
76 can be applied. For tinnitus and dizziness, prevalence estimates are mainly based on self-reports or  
77 interviews. There is, however, no reliable objective measurement method or internationally  
78 standardized recording model for tinnitus (Jackson et al. 2019) or dizziness (Bisdorff et al. 2009).  
79 Secondary data such as health insurance registers are also based on subjective interviews from general  
80 practices or medical practices and are subject to bias. The term dizziness in particular is linguistically  
81 blurred and hardly allows any conclusions to be drawn about its genesis. Accordingly, in primary care,  
82 a plausible diagnosis can only be found in a minority of cases for patients who present with the main  
83 symptom of dizziness. This applies even after extended diagnostics (Kroenke et al. 1992; Bösner et al.  
84 2018).

85 A supposed interplay between hearing and balance is supported by evidence indicating that hearing  
86 loss may affect balance control. It is assumed that the hearing system recognizes spatial information  
87 (Zhong & Yost 2013; Rumalla et al. 2015; Vitkovic et al. 2016). Vice versa, there is evidence that  
88 auditory cues are processed during the perception of balance (Palm et al. 2009; Vitkovic et al. 2016)  
89 and are therefore likely to play a role in postural stability (Lubetzky et al. 2020). More specifically,  
90 hearing loss may have a detrimental effect on balance control (Carpenter & Campos 2020) and hearing  
91 rehabilitation has a beneficial effect on posture and gait (Rumalla et al. 2015; Vitkovic et al. 2016;  
92 Negahban et al. 2017; Louza et al. 2019).

93 Age is a major determinant of both auditory and vestibular dysfunction, with inflammatory aging  
94 processes, oxidative stress, and hereditary factors contributing to increased prevalence with advancing  
95 age (Paplou et al. 2021). While the concept of presbycusis is well-accepted (Yamasoba et al. 2013;  
96 Eckert et al. 2021), the interaction between age and vestibular dysfunction is less well-established  
97 (Schubert et al. 2022). Tinnitus can be an early sign of cochlear dysfunction, which would initially be  
98 outside the scope of common auditory tests (Jafari et al. 2022), as hearing loss can develop in a large  
99 proportion of initially normal-hearing individuals with tinnitus during long-term follow-up (Kehrle et  
100 al. 2022). Multiple lifestyle factors, including low dietary quality (Le Prell et al. 2011; Spankovich &  
101 Le Prell 2013; Curhan et al. 2014; Jung et al. 2019; Dillard et al. 2022), physical inactivity (Curhan et  
102 al. 2013; Tsimpida et al. 2019; Tseng et al. 2022), alcohol consumption, obesity (Biswas et al. 2021;  
103 Biswas & Hall 2021), and smoking have been associated with auditory as well as vestibular  
104 dysfunction. Traditionally, however, hearing loss, tinnitus and dizziness were analyzed separately.

105 Only smoking seems to be a shared risk factor of all three audiovestibular symptoms hearing loss  
106 (Cruickshanks et al. 1998; Zhan et al. 2011; Lin et al. 2013; Tsimpida et al. 2019; Engdahl, Stigum, &  
107 Aarhus 2021; Tseng et al. 2022; Mick et al. 2023), tinnitus (Biswas et al. 2021; Biswas & Hall 2021;  
108 Goderie et al. 2022) and dizziness (Neuhauser et al. 2005; Agrawal et al. 2009) and might therefore be  
109 of particular importance. Smoking, a major cardiovascular risk factor, is linked to auditory and  
110 balance dysfunction, as well as broader cardiovascular disorders. This is exemplified by the fact that  
111 individuals with sensorineural hearing loss have an increased risk of stroke, further heightened after  
112 sudden sensorineural hearing loss (Khosravipour & Rajati 2021; Lammers et al. 2021). In a cohort  
113 study, the presence of a cardiovascular risk profile was associated with hearing loss at baseline.

It is made available under a [CC-BY 4.0 International license](#) .

*Ihler et al.*

*Prevalence of hearing and balance dysfunction*

114 Moreover, normal-hearing individuals at baseline had an increased risk for developing hearing loss  
115 during a 10-year follow-up (Tseng et al. 2022).

116 Given this interconnected nature of hearing and balance, a more comprehensive analysis of the  
117 prevalence and risk factors for individual audiovestibular symptoms is needed. Therefore, this study  
118 analyzed the prevalence of self-reported hearing loss, dizziness and tinnitus in the baseline  
119 examinations of the SHIP-START and SHIP-TREND cohorts as well as the combined occurrence of  
120 these three symptoms. In addition, it was analyzed whether their occurrence is influenced by age, sex,  
121 education, cardiovascular or metabolic risk factors and lifestyle habits.

## 122 **Methods**

### 123 Compliance with ethical and quality standards

124 The studies were conducted in accordance with the Declaration of Helsinki. The study protocols were  
125 approved by the responsible local ethics committee at the University Medicine Greifswald, Germany  
126 (approvals from July 31, 1995 (SHIP-START) and June 06, 2008 (BB 39/08, (SHIP-TREND))). All  
127 participants gave written informed consent.

### 128 Study design and setting

129 The study population derived from the baseline examinations of two independent population-based  
130 samples of the Study of Health in Pomerania (SHIP). Adults aged 20–79 at sampling were selected  
131 from registration data in a randomized, two-stage cluster method stratified by sex and age, drawn from  
132 mainland Western Pomerania (Vorpommern), a rural area in the northeastern German state of  
133 Mecklenburg-Vorpommern. The first cohort, SHIP-START-0 with a response rate of 68.8 %, was  
134 recruited and underwent baseline investigations between 1997 and 2001, the second cohort, SHIP-  
135 TREND-0 with a response rate of 50.1 %, between 2008 and 2012 (Schmidt et al. 2011).

136 SHIP is not focused on a specific disease or organ system, but instead on health and disease in general,  
137 resulting in self-report paper–pencil questionnaires, computer-assisted personal interviews as well as a  
138 comprehensive examination program in each examination wave. The study design and protocols have  
139 been described in detail elsewhere (Völzke et al. 2011; Völzke et al. 2022).

### 140 Variables

#### 141 *Outcome variables*

142 Primary outcome measures were the self-reported occurrence and severity of the audiovestibular  
143 symptoms hearing loss, tinnitus and dizziness in the study population ranging from Grade 0-3. With  
144 regard to suffering from hearing loss and dizziness, grade 0 means "not at all", grade 1 "rarely", grade  
145 2 "moderately", grade 3 "severely". In the case of tinnitus, the occurrence is categorised as grade 0  
146 "no", grade 1 "sometimes", grade 2 "frequently", grade 3 "always". Grade 2 or 3 was considered  
147 clinically relevant severity for subsequent analyses. The exact wording in German with English  
148 translation is given in Supplemental Table 1.

#### 149 *Exposure variables*

150 The age at the day of baseline investigation was used for further analyses. Sex was documented in  
151 binary categories. Education was assessed during an interview and graded along the German  
152 educational framework. Behavioral risk factors included smoking status (never/former, or current  
153 smoker). Pack years were calculated as average number of cigarettes smoked per day multiplied by the  
154 number of years smoking divided by 20. Alcohol consumption was assessed in grams ethanol per day  
155 derived from a quantity–frequency questionnaire (Baumeister et al. 2005). Physical inactivity was  
156 defined as 1 h leisure time physical activity or less per week

157 Body mass index (BMI) and waist-to-hip-ratio were obtained via standardized measurement of body  
158 weight and height as well as waist and hip circumference and subsequent calculation. Diabetes  
159 mellitus was defined as insulin resistance >8.0 mmol/L non-fasting glucose or reported diabetes or  
160 reported diabetes treatment and/or dietary treatment. Arterial hypertension was defined as increased  
161 systolic or diastolic blood pressure >140/90 mmHg or reported hypertension/reported antihypertensive

162 medication. Metabolic syndrome was defined using a modification of the approach suggested by  
163 Alberti and coworkers as a combination of three out of five parameters: present diabetes mellitus as  
164 defined above; abdominal obesity: waist circumference > 94 cm (male) or > 80 cm (female); low  
165 HDL- cholesterol: < 1.03 mmol/L (male) or < 1.3 mmol/L (female); high triglycerides: > 2.3 mmol/L  
166 non-fasting triglycerides or lipid-lowering medication; present hypertension as defined above (Alberti  
167 et al. 2009; Schipf et al. 2010; Buchmann et al. 2022).

168 For laboratory parameters, random blood samples were collected without stasis from the cubital vein  
169 following a standardized protocol, refrigerated to 4-8°C and shipped on refrigerant packing within 4 to  
170 a maximum of 6h to the laboratory. Serum levels of glucose, total cholesterol, HDL cholesterol, and  
171 triglycerides were measured using the Dimension Vista 500 analytical system (Siemens Healthcare  
172 Diagnostics, Eschborn, Germany). Dyslipidemia was defined as intake of lipid-lowering medication  
173 (ATC C10) or increased levels of total cholesterol ( $\geq 6.2$  mmol/L), total cholesterol-HDL-cholesterol-  
174 ratio ( $\geq 5.0$ ) or LDL-cholesterol ( $\geq 4.1$  mmol/L)

## 175 Participants

176 In total, 8727 persons underwent baseline investigations in the cohorts SHIP-START (n= 4308) and  
177 SHIP-TREND (n= 4420). One participant from SHIP-START withdrew consent. The outcome  
178 variables were not completed by 593 participants (SHIP-START n= 93, SHIP-TREND n= 500).  
179 Therefore, datasets with the primary variables were available for this analysis from 8134 individuals  
180 (93.20%). Details on the study population are given in Supplemental Table 2.

## 181 Analysis and reporting of data

182 Weighting was used to adjust for bias due to differences in responses, probabilities of selection, and  
183 discrepancies between data from official statistics and our samples with regard to demographic and  
184 geographical distributions (Schmidt et al. 2011). As different ways were used for sampling in SHIP-  
185 START-0 and SHIP-TREND-0, all data except those in Table 1 were standardized using post  
186 stratification weighting. The factors included in the post stratification weighting were age, sex, and the  
187 data of the local registration office. Based on the data of the non-responder survey, the probability of  
188 participation in SHIP-TREND-0 was estimated by means of logistic regression. The resulting inverse  
189 probability weights were multiplied by the post stratification weights in SHIP-TREND-0.

190 Prevalence of audiovestibular symptoms were reported stratified by sex and age groups. Correlations  
191 between the audiovestibular symptoms hearing loss, tinnitus, and dizziness were calculated by phi-  
192 coefficients. Stratified by grade 2 symptoms, characteristics of the study population were reported as  
193 median, 25th and 75th percentile for continuous data and as percentage for categorical data. Group  
194 comparisons were conducted by Mann-Whitney U-tests for continuous data and by  $\chi^2$ -tests for  
195 categorical data. Associations of behavioral and metabolic markers with audiovestibular symptoms  
196 were calculated by logistic regression models adjusted for age, sex, and study cohort. To make the  
197 odds ratios comparable, continuous exposure variables were standardized before usage in the  
198 regression models. In all analyses a  $p < 0.05$  was considered as statistically significant. Analyses were  
199 done with Stata 17.0 (Stata Corporation; College Station, USA).



## 200 **Results**

201 In our study population of 8134 individuals we observed a relevant severity (grade 2 or 3) of  
202 audiovestibular symptoms with 2350 (28.9%) reporting at least one symptom. Hearing loss affected  
203 1190 individuals (14.6%), tinnitus 815 (10.0%) and dizziness 1114 (13.7%). Notably, 28.0% of cases  
204 with symptoms (658/2350) reported more than one (8.1% of total 8134). Among these, 547 (6.7%)  
205 had two symptoms, and 111 (1.4%) experienced all three. A breakdown by individual symptoms and  
206 age is given in Figure 1A. Considering possible sampling bias, we derived a weighted prevalence of  
207 14.2% for hearing loss, 9.7% for tinnitus and 13.5% for dizziness in the Western Pomeranian  
208 population. Occurrence of symptoms varied depending on sex, with hearing loss being more prevalent  
209 in males and dizziness in females as shown in Figure 1B.

210 There was also a trend towards symptoms influencing each other. The correlation for the co-  
211 occurrence of relevant symptoms (phi-coefficient) was 0.318 for hearing loss and tinnitus, 0.127 for  
212 hearing loss and dizziness as well as 0.102 for tinnitus and dizziness. This represents a moderate  
213 positive relationship between hearing loss and tinnitus that is comparatively stronger than the two  
214 other pairings.

215 A comparison of the two cohorts, which were recruited almost ten years apart, interestingly showed a  
216 significant increase in the prevalence of audiovestibular symptoms in the later SHIP-TREND-0 cohort.  
217 Hearing loss increased from 14.1% (95% CI 12.5; 15.6) to 17.9% (95% CI 16.1; 19.7) in males ( $p=$   
218 0.001) and from 9.8% (95% CI 8.5; 11.1) to 13.5% (95% CI 11.7; 15.2) in females ( $p=$  0.001).  
219 Likewise, the prevalence for tinnitus increased from 8.3% (95% CI 7.1; 9.5) to 10.4% (95% CI 9.0;  
220 11.8) in males ( $p=$  0.022) and from 7.2% (95% CI 6.1; 8.4) to 11.6% (95% CI 10.0; 13.2) in females  
221 ( $p<$  0.001). In contrast, the prevalence of dizziness showed an increase from 7.8% (95% CI 6.6; 9.1) to  
222 10.0% (95% CI 8.6; 11.5) in males ( $p=$  0.023), but decreased from 19.8% (95% CI 18.0; 21.6) to  
223 16.4% (95% CI 14.5; 18.2) in females ( $p=$  0.011). Thereby, the prevalence of at least one grade 2  
224 symptom increased significantly from 23.1% (95% CI 21.1; 25.0) to 28.4% (95% CI 26.3; 30.5) in  
225 males ( $p<$  0.001). This has brought the prevalence closer towards the level of females, where it has not  
226 changed significantly.

227 To explore potential risk factors, we stratified the entire cohort according to the absence or presence of  
228 grade 2 symptoms. While sex was evenly distributed here, individuals with grade 2 symptoms were  
229 significantly older. A wide range of lifestyle habits as well as metabolic or cardiovascular risk factors  
230 and disorders were significantly associated with the presence of symptoms. An overview is given in  
231 Table 1.

232 In addition, the presence of relevant single or combined audiovestibular symptoms increased with age.  
233 Among 2614 individuals aged 60 or older, 1170 (44.8%) reported at least one, 391 (15.0%) two and  
234 69 (2.6%) all three symptoms. This was even more pronounced among 1097 individuals aged 70 or  
235 older with 579 (52.8%) reporting at least one, 218 (19.9%) two and 38 (3.5%) all three. The same  
236 trend was observed when weighted prevalence was broken down by age and sex. In the oldest age  
237 group of 70 to 81 years at the day of examinations, the majority of individuals reported at least one  
238 grade 2 symptom in both sexes. Dizziness was leading in females until overtaken by hearing loss in  
239 the oldest age group (Figure 2A). In contrast, the dominant symptom in males was hearing loss from  
240 the age group of 30 to 39 on, increasing from a weighted prevalence of 6.2% to 41.7% in the oldest  
241 group (Figure 2B).

242 Following this, further analyses were adjusted for age and sex (Table 2). Education emerged as the  
243 most influential factor, significantly reducing the odds of experiencing any relevant symptoms by 45%

244 for individuals with more than 10 years of schooling compared to those with less than 10 years. This  
245 effect was most pronounced for dizziness, followed by hearing loss.

246 Smoking was the only factor that was significantly associated with all three audiovestibular symptoms  
247 as well as the only risk factor significantly associated with tinnitus at all. Notably, this association was  
248 most distinct when comparing former smokers to individuals who never smoked. The presence of type  
249 2 diabetes and higher triglycerides showed a statistically significant association with the occurrence of  
250 both hearing loss and dizziness. Elevated levels of serum glucose and the presence of arterial  
251 hypertension were significantly associated with increased odds of hearing loss. On the other hand,  
252 HbA1c, serum HDL-cholesterol, and a diagnosis of dyslipidemia were positively associated with  
253 dizziness only.

254 Subsequently, an in-depth exploration of the factors of education and smoking was conducted to  
255 assess their relevance for individual and any grade 2 symptoms, broken down by sex (Figure 3). While  
256 higher education was associated with reduced odds for hearing loss, dizziness, tinnitus and any grade 2  
257 symptom in both sexes. Additionally, medium education, as compared to low education, significantly  
258 decreased the odds for all individual as well as any grade 2 symptoms in females only. Former female  
259 smokers showed significantly increased odds for hearing loss, tinnitus and any grade 2 symptom while  
260 in males, this association was only observed for dizziness. No significant findings were identified  
261 regarding current versus never smokers in both sexes. The most notable odds ratios were observed for  
262 high versus low education, indicating reduced odds for dizziness in females of 0.45 (95% CI 0.30;  
263 0.56) and hearing loss in males of 0.51 (95% CI 0.39; 0.68) as well as any grade 2 symptoms in  
264 females of 0.51 (95% CI 0.39; 0.66) and males of 0.53 (95% CI 0.42; 0.68), respectively.



## 265 **Discussion**

266 Our results established the prevalence and co-prevalence of audiovestibular symptoms in a population-  
267 based sample. It is important to note that each symptom has a different set of possible causes with a  
268 considerable overlap between symptoms. Additionally, a wide range of topographic locations of the  
269 ear or associated systems may be involved in underlying conditions.

270 Self-reported hearing loss and dizziness or vertigo might have other causes than middle or inner ear  
271 dysfunction as determined by audiological or vestibular diagnostic tests. In screening for hearing loss,  
272 the value of a single question is well established and reaches a sensitivity and specificity of 80% and  
273 74%, respectively (Feltner et al. 2021). Likewise, in epidemiological studies, self-reported hearing loss  
274 was validated as a reasonable estimate for audiological determined hearing loss as standard mode of  
275 assessment: Sindhusake and coworkers summarized for different short questions on subjective hearing  
276 loss a sensitivity of 66 – 78% and a specificity of 67 – 80% for audiometrically proven mild hearing  
277 loss. For moderate hearing loss, the sensitivity was given as 90 – 93% and the specificity as 56 – 71%  
278 (Sindhusake et al. 2001). Discrepancies as over- or underreporting of audiometrically determined  
279 hearing loss can result from exposure to occupational noise, hypotension, and depression (Choi et al.  
280 2019). In a study with very detailed characterization of hearing, 20.2% of the subjects with self-  
281 reported hearing loss did not even meet the definition of mild hearing loss in the pure-tone audiogram  
282 while 6.2% of the individuals reporting no hearing problem did have at least mild hearing loss in  
283 audiometry (Gates et al. 1990). Since self-reported moderate to severe hearing loss correlates with  
284 objective measurements with high sensitivity, this method can be considered reliable in an  
285 epidemiological context.

286 Our results indicate a higher prevalence of hearing disorders in the Western Pomeranian population  
287 than what would be assumed by reports from other studies. In population-based studies that included  
288 all age ranges of adult individuals, the prevalence of self-reported hearing loss ranged from 13.0 to  
289 26.8% in studies from Eastern Asia and Northern America (Choi et al. 2019; Dillard et al. 2022),  
290 placing our result within this range of developed countries with high life expectancy. This is, however,  
291 considerably higher than a global estimate that places the prevalence of moderate to severe hearing  
292 loss at 5.2% globally and 5.8% for the European region, where the present study originated. Those  
293 notably excluded self-reported hearing loss and thereby only considered prevalence figures based on  
294 audiological assessment (Orji et al. 2020). Another study extrapolated a prevalence of 16.2% for mild  
295 and 5.8% for moderate hearing loss for Germany based on two different investigations in three  
296 samples based on audiometry (Gablenz et al. 2017).

297 For tinnitus, a subjective sensation of the auditory pathway by definition, no objective diagnostic test  
298 exists (Jackson et al. 2019). Thus, self-report is an established measure for tinnitus in epidemiological  
299 studies (McCormack et al. 2016) and usually presents a point prevalence. In our Western Pomeranian  
300 population sample, we observed a weighted prevalence of 9.7% for tinnitus that is generally in line  
301 with previous reports. This leads to reported ranges of 5.1 to 42.7% when asked without qualifier and  
302 3.0 to 30.9% when only bothersome tinnitus is considered (McCormack et al. 2016).

303 Assessing dizziness or vertigo, simple or structured questions are considered to have unsatisfactory  
304 sensitivity and specificity for pathological findings in vestibular testing, as demonstrated by the poor  
305 predictive capability of a widely used questionnaire in epidemiological research (Cohen et al. 2022).  
306 In the realm of self-report, the phrasing of questions on balance disorders is complex and linguistically  
307 nuanced. The German term ‘Schwindel’ for ‘dizziness’ or ‘vertigo’ can include a wide variety of  
308 sensations and does not allow any conclusions to be drawn about the genesis. The distinction between  
309 ‘dizziness’ and ‘vertigo’ has been debated, with the latter presumed to be more specific for rotational

310 perception indicative of peripheral vestibular disorders (Murdin & Schilder 2015). Despite progress in  
311 defining these terms (Bisdorff et al., 2009), there remains no universally accepted solution for  
312 epidemiological investigations. While acknowledging the limitations of self-reported symptoms in the  
313 absence of diagnostic tests, they do capture the whole and thereby a more complex processing  
314 pathway from basic sensory perception to cognition, including emotional assessment and mood as well  
315 as cardiovascular and neurological status.

316 With an equal large population-based cohort with self-reports, Neuhauser and coworkers identified a  
317 higher lifetime prevalence of 29.5%, compared to our results, for moderate or severe vertigo or  
318 dizziness by a single question that was comparable to our approach. Of note, in a focused  
319 neurotological interview thereafter 24.2% of those individuals reported symptoms that were suggestive  
320 of a peripheral vestibular disorder (Neuhauser et al. 2005). With their similar epidemiologically  
321 representative cohort, it is likely that a comparable distribution underlies the dizziness complaints  
322 determined in our population. However, to clarify this, either a specialized interview or, preferably,  
323 vestibular diagnostic tests have to be performed. This, however, was out of the scope of this work. The  
324 estimates for the prevalence of dizziness without consideration of a potential peripheral vestibular  
325 origin range from 15 to 35% (Murdin & Schilder 2015; Maudoux et al. 2022). When vertigo is  
326 considered separately as dysfunction of the peripheral vestibular organ in the inner ear, 3 - 10% are  
327 given (Murdin & Schilder 2015). In a community-based study from north-eastern France, the view of  
328 ‘vertigo’ as a term for primarily vestibular dysfunction as a subset of balance dysfunction is even more  
329 challenged. The reported one-year prevalence of vertigo of as high as 48.3%, while unsteadiness and  
330 dizziness were noted by only 39.1% and 35.6% of individuals, respectively (Bisdorff et al. 2013).

331 Although audiovestibular symptoms are assumed to be common, the wide variance in prevalence  
332 numbers in the literature can be attributed to differences in the definition of disorders, cut-off values in  
333 diagnostic tests, and various assessment methods (Murdin & Schilder 2015; McCormack et al. 2016;  
334 Sheffield & Smith 2019). Additionally, the prevalence can be assumed to be heavily influenced by  
335 factors like age, as determined by the age distribution in the underlying population. Likewise, studies  
336 on older populations typically yield a higher prevalence of symptoms. Furthermore, point prevalence,  
337 period prevalence and lifetime prevalence are often not clearly distinguishable by self-report. In the  
338 Framingham cohort (age 60 and older), self-reported hearing loss was noted in 41.1%, mild hearing  
339 loss in 29%, and tinnitus in 16.8% of individuals (Gates et al. 1990). Similarly, the Blue Mountains  
340 Hearing Study (age 49 and older) reported prevalence rates of 39.7%, 13.9%, and 2.3% for mild,  
341 moderate, and severe self-reported hearing loss, respectively (Sindhusake et al. 2001). Among the  
342 individuals investigated here, hearing loss was more prevalent in males and dizziness in females.  
343 Beyond this, the prevalence rose markedly with advancing age, leading to the majority of individuals  
344 at 70 years or older reporting audiovestibular symptoms. The dominant contributor here was hearing  
345 loss in both sexes, closely followed by dizziness in females.

346 To avoid confounding between the two cohorts, adjustments were made for the slightly different age  
347 and gender distribution in SHIP-START and SHIP-TREND. Nevertheless, we observed an increase in  
348 the prevalence of hearing loss and tinnitus in both genders and an increase in vertigo in men between  
349 the two SHIP cohorts analyzed in this study. These shifts within a comparable short timeframe of  
350 about 10 years, separating SHIP-START and SHIP-TREND cohorts, run counter to a possible  
351 decrease due to social development, health-related legislation and public-health programs. Despite  
352 these unexpected trends in our study, changes in prevalence have been previously reported for thyroid  
353 disorders (Khattak et al. 2016) and lifestyle-related risk factors (Völzke et al. 2015). The observed  
354 changes in audiovestibular health within the population raise interesting questions and therefore  
355 warrant further investigation.

356 We also studied the association of several individual risk and lifestyle-related factors with  
357 audiovestibular symptoms. Education was the most prominent factor in our study, significantly  
358 reducing the odds of any relevant symptom by 45% as well as hearing loss and dizziness individually  
359 when more than 10 years of schooling were compared to less than 10 years. This may be a sign for a  
360 shared pathway of neurodegeneration affecting both cognition and sensory systems (Brenowitz et al.  
361 2019; Paplou et al. 2021). Cognitive stimulation, approximated by the level of education attained  
362 during life and strongly influenced by hearing and communication abilities, is a major factor  
363 influencing dementia risk in later life (Livingston et al. 2020). Likewise, a strong association is  
364 assumed between hearing loss and cognitive decline (Uchida et al. 2019), with neurodegeneration as  
365 one underlying pathomechanism of central and peripheral auditory dysfunction as well as  
366 simultaneously being signified early by hearing difficulties and reinforced by sensory deprivation  
367 (Johnson et al. 2021).

368 Contrastingly, increasing education as well as reduced occupational noise exposure, ear infections and  
369 smoking in the population are considered to lead to less ear disorders, especially hearing loss  
370 (Engdahl, Stigum, & Aarhus 2021; Engdahl, Strand, & Aarhus 2021). However, for self-reported  
371 measures increased awareness or higher health expectations in more recent generations may also play  
372 a role. That has been brought forward as an explanation of an age-specific increase in the prevalence  
373 of tinnitus in age groups that were five years apart despite an overall declining prevalence of hearing  
374 loss in a study from Wisconsin, USA (Nondahl et al. 2012).

375 In our study, several cardiovascular risk factors were investigated as an association to hearing or  
376 balance dysfunction can be assumed due to numerous references in the literature. Thereby,  
377 associations with smoking, diabetes, dyslipidemia and hypertension were found. Smoking was the  
378 only single factor that was significantly associated with all three audiovestibular symptoms in our  
379 study. In the past, similar associations for smoking and decreased audiovestibular health have been  
380 reported mostly individually for hearing loss (Cruickshanks et al. 1998; Lin et al. 2013; Tsimpida et al.  
381 2019; Engdahl, Stigum, & Aarhus 2021; Tseng et al. 2022; Mick et al. 2023), tinnitus (Biswas et al.  
382 2021; Biswas & Hall 2021; Goderie et al. 2022) and dizziness (Neuhauser et al. 2005; Agrawal et al.  
383 2009). In an animal model of oxidative stress, degeneration and loss of cochlear spiral ganglion  
384 neurons have been documented after chronic exposure to cigarette smoke (Paquette et al. 2018). This  
385 mechanism might be equally relevant for the development of tinnitus or dizziness, as other neuronal  
386 tissues are also degraded.

387 In previous reports, diabetes mellitus was associated with dysfunction of the auditory and vestibular  
388 systems (Agrawal et al. 2009; Horikawa et al. 2013; Biswas & Hall 2021; Samocha-Bonet et al. 2021;  
389 Tseng et al. 2022). It has been described in relation to hearing loss (Horikawa et al. 2013; Samocha-  
390 Bonet et al. 2021; Tseng et al. 2022; Mick et al. 2023), balance disturbance (Agrawal et al. 2009) as  
391 well as tinnitus (Biswas & Hall 2021). In our data, however, diabetes was linked to hearing loss and  
392 dizziness but not to tinnitus. The complex relationship between diabetes mellitus and hearing loss has  
393 been explored in the past and likely includes a multitude of different routes like toxic effects of  
394 hyperglycemia, diabetic microangiopathy and neuropathy as well as side-effects of diabetic  
395 medications (Samocha-Bonet et al. 2021) and likely takes place at a precursor stage of diabetes  
396 already (Seo et al. 2016). Additionally, for the relationship between diabetes and balance dysfunction,  
397 a possible role for central insulin resistance has been suggested (Case et al. 2022).

398 The association found here between dyslipidemia as well as hearing loss and dizziness confirms earlier  
399 reports in this regard (Neuhauser et al. 2005; Nash et al. 2011), but a detailed mechanism is still  
400 warranted. While in a mouse model of hyperlipidemia, the development of hearing loss could be

401 prevented by a statin (Lee et al. 2020), a cross-sectional study on humans did not find dyslipidemia  
402 alone to be directly associated with hearing loss (Hara et al. 2020).

403 A diagnosis of arterial hypertension was only significantly associated with hearing loss in our data,  
404 confirming earlier studies (Tseng et al. 2022; Mick et al. 2023). Previous reports linked this condition  
405 to tinnitus (Biswas & Hall 2021) and dizziness (Neuhauser et al. 2005; Agrawal et al. 2009; Nash et al.  
406 2011) as well. Looking at our findings on cardiovascular risk factors and audiovestibular dysfunction  
407 in the light of the body of evidence from the literature, a strong but complex link can be assumed. Due  
408 to a multifaceted interaction, the effect sizes may be too small to be assessed by surrogate markers in  
409 individual studies.

410 An interaction between function and dysfunction of the senses of hearing and balance is widely  
411 assumed. Through the calculation of the phi-coefficient, we identified a moderate positive relationship  
412 between hearing loss and tinnitus with inconclusive results for the other two pairings. A population-  
413 based cross-sectional study in individuals of 50 years and older found a significant association  
414 between dizziness and tinnitus, but not between dizziness and hearing loss (Gopinath et al. 2009). In a  
415 clinical setting, age-related high frequency-hearing loss was not associated to measurable peripheral  
416 vestibular dysfunction (Schubert et al. 2022), emphasizing that the detailed mechanism of interaction  
417 between auditory and vestibular dysfunction is still elusive. It is, however, necessary to gain more  
418 insight in the future, since multisensory impairment is reported to be strongly associated with  
419 neurodegeneration, an association that has been already found for vision, hearing, smell, and touch  
420 (Brenowitz et al. 2019) and could well be applicable to the interaction of hearing and balance as well.

421 **Conclusion**

422 The study provides robust evidence of a higher prevalence of audiovestibular symptoms in the  
423 Western Pomeranian population than previously assumed. A relevant subgroup reported more than  
424 one symptom, thus highlighting the multilayered relations between these three symptoms, which have  
425 been regarded only separately in previous studies. Self-reported measures, despite their limitations,  
426 emerge as reliable indicators of hearing loss and other audiovestibular symptoms, as supported by  
427 comparisons with audiometric assessments and validation studies.

428 Sex and age have a major influence on the expression of audiovestibular symptoms. Surprisingly, the  
429 prevalence of hearing loss and tinnitus increased significantly over a period of approximately 10 years  
430 when both epidemiologically representative cohorts SHIP-START and SHIP-TREND were compared.  
431 The study identifies education as a significant protective factor against audiovestibular symptoms,  
432 while only smoking was associated with the occurrence of all individual audiovestibular symptoms.  
433 The risk for hearing loss only was increased by higher levels of glucose and arterial hypertension  
434 while dizziness only was facilitated by dyslipidemia as well as increased levels of HbA1c. These  
435 findings contribute to our understanding of the complex interplay between lifestyle and health  
436 outcomes.

437 Additional investigations employing more precise assessment tools and longitudinal methodologies  
438 are essential to elucidate the intricate interplay among these three audiovestibular symptoms.  
439 Furthermore, a deeper understanding of the mechanisms involved in potentially influencing risk and  
440 lifestyle factors necessitates more detailed exploration. Broad cohort studies on the prevalence of  
441 audiovestibular symptoms are essential for public health planning, improving clinical care,  
442 understanding epidemiological patterns, identifying risk factors, adopting a holistic health approach,  
443 and guiding future research initiatives in the field of auditory and vestibular health.

It is made available under a [CC-BY 4.0 International license](#) .

*Ihler et al.*

*Prevalence of hearing and balance dysfunction*

444 **Acknowledgements**

445 The authors are grateful to the participating population of Western Pomerania and to the team  
446 involved in the conception and conduction of SHIP-START and SHIP-TREND.

447 Parts of this work were presented at the 94th Annual Meeting of the German Society of Oto-Rhino-  
448 Laryngology, Head and Neck Surgery, May 17 to May 20, 2023, in Leipzig, Germany  
449 (<https://doi.org/10.1055/s-0043-1767437>).



450 **References**

- 451 Agrawal, Y., Carey, J. P., Della Santina, C. C. et al. (2009). Disorders of balance and vestibular  
452 function in US adults: data from the National Health and Nutrition Examination Survey, 2001-  
453 2004. *ARCHIVES OF INTERNAL MEDICINE*, 169(10), 938–944.  
454 <https://doi.org/10.1001/archinternmed.2009.66>
- 455 Alberti, K. G. M. M., Eckel, R. H., Grundy, S. M. et al. (2009). Harmonizing the metabolic syndrome:  
456 a joint interim statement of the International Diabetes Federation Task Force on Epidemiology and  
457 Prevention; National Heart, Lung, and Blood Institute; American Heart Association; World Heart  
458 Federation; International Atherosclerosis Society; and International Association for the Study of  
459 Obesity. *Circulation*, 120(16), 1640–1645.  
460 <https://doi.org/10.1161/CIRCULATIONAHA.109.192644>
- 461 Baumeister, S. E., Alte, D., Meyer, C. et al. (2005). Riskanter Alkoholkonsum und alkoholbezogene  
462 Störungen in Vorpommern: Die Studie "Leben und Gesundheit in Vorpommern" (SHIP) und der  
463 Bundesgesundheitsurvey 1998 im Vergleich [Health Risk drinking and problematic consumption  
464 of alcohol in Pomerania: comparative analysis of the Study of Health in Pomerania (SHIP)  
465 compared with the Federal German Health and Examination Survey in 1998]. *Gesundheitswesen*  
466 (*Bundesverband der Ärzte des Öffentlichen Gesundheitsdienstes (Germany)*), 67(1), 39–47.  
467 <https://doi.org/10.1055/s-2004-813829>
- 468 Bisdorff, A., Bosser, G., Gueguen, R. et al. (2013). The epidemiology of vertigo, dizziness, and  
469 unsteadiness and its links to co-morbidities. *Frontiers in neurology*, 4.  
470 <https://doi.org/10.3389/fneur.2013.00029>
- 471 Bisdorff, A., Brevern, M. von, Lempert, T. et al. (2009). Classification of vestibular symptoms:  
472 towards an international classification of vestibular disorders. *JOURNAL OF VESTIBULAR*  
473 *RESEARCH-EQUILIBRIUM & ORIENTATION*, 19(1-2), 1–13. <https://doi.org/10.3233/VES-2009-0343>
- 475 Biswas, R., & Hall, D. A. (2021). Prevalence, Incidence, and Risk Factors for Tinnitus. In G. D.  
476 Searchfield & J. Zhang (Eds.), *The Behavioral Neuroscience of Tinnitus* (Vol. 51, pp. 3–28).  
477 Cham: Springer International Publishing. [https://doi.org/10.1007/7854\\_2020\\_154](https://doi.org/10.1007/7854_2020_154)
- 478 Biswas, R., Lugo, A., Genitsaridi, E. et al. (2021). Modifiable lifestyle-related risk factors for tinnitus  
479 in the general population: An overview of smoking, alcohol, body mass index and caffeine intake.  
480 *Progress in brain research*, 263, 1–24. <https://doi.org/10.1016/bs.pbr.2021.04.005>
- 481 Bösner, S., Schwarm, S., Grevenrath, P. et al. (2018). Prevalence, aetiologies and prognosis of the  
482 symptom dizziness in primary care - a systematic review. *BMC family practice*, 19(1), 33.  
483 <https://doi.org/10.1186/s12875-017-0695-0>
- 484 Brenowitz, W. D., Kaup, A. R., Lin, F. R. et al. (2019). Multiple Sensory Impairment Is Associated  
485 With Increased Risk of Dementia Among Black and White Older Adults. *The journals of*  
486 *gerontology. Series A, Biological sciences and medical sciences*, 74(6), 890–896.  
487 <https://doi.org/10.1093/gerona/gly264>
- 488 Buchmann, N., Ittermann, T., Demuth, I. et al. (2022). Lipoprotein(a) and Metabolic Syndrome.  
489 *Deutsches Arzteblatt international*, 119(15), 270–276. <https://doi.org/10.3238/arztebl.m2022.0153>
- 490 Carpenter, M. G., & Campos, J. L. (2020). The Effects of Hearing Loss on Balance: A Critical  
491 Review. *EAR AND HEARING*, 41 Suppl 1, 107S-119S.  
492 <https://doi.org/10.1097/AUD.0000000000000929>
- 493 Case, S. L., Frazier, H. N., Anderson, K. L. et al. (2022). Falling Short: The Contribution of Central  
494 Insulin Receptors to Gait Dysregulation in Brain Aging. *Biomedicines*, 10(8).  
495 <https://doi.org/10.3390/biomedicines10081923>



- 496 Choi, J. E., Moon, I. J., Baek, S.-Y. et al. (2019). Discrepancies between self-reported hearing  
497 difficulty and hearing loss diagnosed by audiometry: prevalence and associated factors in a national  
498 survey. *BMJ OPEN*, 9(4), e022440. <https://doi.org/10.1136/bmjopen-2018-022440>
- 499 Cohen, H. S., Sangi-Haghepeykar, H., & Plankey, M. W. (2022). Subjective versus objective tests of  
500 dizziness and vestibular function in epidemiologic screening research. *Journal of vestibular*  
501 *research : equilibrium & orientation*, 32(1), 7–14. <https://doi.org/10.3233/VES-210022>
- 502 Cruickshanks, K. J., Klein, R., Klein, B. E. et al. (1998). Cigarette smoking and hearing loss: the  
503 epidemiology of hearing loss study. *JAMA*, 279(21), 1715–1719.  
504 <https://doi.org/10.1001/jama.279.21.1715>
- 505 Curhan, S. G., Eavey, R. D., Wang, M. et al. (2014). Fish and fatty acid consumption and the risk of  
506 hearing loss in women. *AMERICAN JOURNAL OF CLINICAL NUTRITION*, 100(5), 1371–1377.  
507 <https://doi.org/10.3945/ajcn.114.091819>
- 508 Curhan, S. G., Eavey, R., Wang, M. et al. (2013). Body mass index, waist circumference, physical  
509 activity, and risk of hearing loss in women. *The American journal of medicine*, 126(12), 1142.e1-8.  
510 <https://doi.org/10.1016/j.amjmed.2013.04.026>
- 511 Dillard, L. K., Walsh, M. C., Merten, N. et al. (2022). Prevalence of Self-Reported Hearing Loss and  
512 Associated Risk Factors: Findings From the Survey of the Health of Wisconsin. *Journal of speech,*  
513 *language, and hearing research : JSLHR*, 65(5), 2016–2028. [https://doi.org/10.1044/2022\\_JSLHR-](https://doi.org/10.1044/2022_JSLHR-21-00580)  
514 [21-00580](https://doi.org/10.1044/2022_JSLHR-21-00580)
- 515 Eckert, M. A., Harris, K. C., Lang, H. et al. (2021). Translational and interdisciplinary insights into  
516 presbycusis: A multidimensional disease. *Hearing research*, 402, 108109.  
517 <https://doi.org/10.1016/j.heares.2020.108109>
- 518 Engdahl, B., Stigum, H., & Aarhus, L. (2021). Explaining better hearing in Norway: a comparison of  
519 two cohorts 20 years apart - the HUNT study. *BMC PUBLIC HEALTH*, 21(1).  
520 <https://doi.org/10.1186/s12889-021-10301-1>
- 521 Engdahl, B., Strand, B. H., & Aarhus, L. (2021). Better Hearing in Norway: A Comparison of Two  
522 HUNT Cohorts 20 Years Apart. *EAR AND HEARING*, 42(1), 42–52.  
523 <https://doi.org/10.1097/AUD.0000000000000898>
- 524 Feltner, C., Wallace, I. F., Kistler, C. E. et al. (2021). Screening for Hearing Loss in Older Adults:  
525 Updated Evidence Report and Systematic Review for the US Preventive Services Task Force.  
526 *JAMA*, 325(12), 1202–1215. <https://doi.org/10.1001/jama.2020.24855>
- 527 Gablenz, P. von, Hoffmann, E., & Holube, I. (2017). Prevalence of hearing loss in Northern and  
528 Southern Germany: Prävalenz von Schwerhörigkeit in Nord- und Süd-Deutschland [Prevalence of  
529 hearing loss in Northern and Southern Germany]. *HNO*, 65(Suppl 2), 130–135.  
530 <https://doi.org/10.1007/s00106-016-0318-4>
- 531 Gates, G. A., Cooper, J. C., Kannel, W. B. et al. (1990). Hearing in the elderly: the Framingham  
532 cohort, 1983-1985. Part I. Basic audiometric test results. *EAR AND HEARING*, 11(4), 247–256.
- 533 GBD 2019 Hearing Loss Collaborators. (2021). Hearing loss prevalence and years lived with  
534 disability, 1990-2019: findings from the Global Burden of Disease Study 2019. *Lancet (London,*  
535 *England)*, 397(10278), 996–1009. [https://doi.org/10.1016/S0140-6736\(21\)00516-X](https://doi.org/10.1016/S0140-6736(21)00516-X)
- 536 Goderie, T., van Wier, M. F., Lissenberg-Witte, B. I. et al. (2022). Factors Associated With the  
537 Development of Tinnitus and With the Degree of Annoyance Caused by Newly Developed  
538 Tinnitus. *EAR AND HEARING*, 43(6), 1807–1815.  
539 <https://doi.org/10.1097/AUD.0000000000001250>
- 540 Gopinath, B., McMahon, C. M., Rochtchina, E. et al. (2009). Dizziness and vertigo in an older  
541 population: the Blue Mountains prospective cross-sectional study. *Clinical otolaryngology : official*

- 542 *journal of ENT-UK ; official journal of Netherlands Society for Oto-Rhino-Laryngology &*  
543 *Cervico-Facial Surgery*, 34(6), 552–556. <https://doi.org/10.1111/j.1749-4486.2009.02025.x>
- 544 Hara, K., Okada, M., Takagi, D. et al. (2020). Association between hypertension, dyslipidemia, and  
545 diabetes and prevalence of hearing impairment in Japan. *Hypertension research : official journal of*  
546 *the Japanese Society of Hypertension*, 43(9), 963–968. <https://doi.org/10.1038/s41440-020-0444-y>
- 547 Horikawa, C., Kodama, S., Tanaka, S. et al. (2013). Diabetes and risk of hearing impairment in adults:  
548 a meta-analysis. *The Journal of clinical endocrinology and metabolism*, 98(1), 51–58.  
549 <https://doi.org/10.1210/jc.2012-2119>
- 550 Jackson, R., Vijendren, A., & Phillips, J. (2019). Objective Measures of Tinnitus: a Systematic  
551 Review. *OTOLOGY & NEUROTOLOGY*, 40(2), 154–163.  
552 <https://doi.org/10.1097/MAO.0000000000002116>
- 553 Jafari, Z., Baguley, D., Kolb, B. E. et al. (2022). A Systematic Review and Meta-Analysis of Extended  
554 High-Frequency Hearing Thresholds in Tinnitus With a Normal Audiogram. *EAR AND HEARING*,  
555 43(6), 1643–1652. <https://doi.org/10.1097/AUD.0000000000001229>
- 556 Johnson, J. C. S., Marshall, C. R., Weil, R. S. et al. (2021). Hearing and dementia: from ears to brain.  
557 *Brain : a journal of neurology*, 144(2), 391–401. <https://doi.org/10.1093/brain/awaa429>
- 558 Jung, S. Y., Kim, S. H., & Yeo, S. G. (2019). Association of Nutritional Factors with Hearing Loss.  
559 *NUTRIENTS*, 11(2). <https://doi.org/10.3390/nu11020307>
- 560 Kehrle, H. M., Granjeiro, R. C., Sampaio, A. L. L. et al. (2022). Ten Years Follow Up of Patients with  
561 Tinnitus and Normal Hearing. *The international tinnitus journal*, 26(1), 57–62.  
562 <https://doi.org/10.5935/0946-5448.20220008>
- 563 Khattak, R. M., Ittermann, T., Nauck, M. et al. (2016). Monitoring the prevalence of thyroid disorders  
564 in the adult population of Northeast Germany. *Population health metrics*, 14, 39.  
565 <https://doi.org/10.1186/s12963-016-0111-3>
- 566 Khosravipour, M., & Rajati, F. (2021). Sensorineural hearing loss and risk of stroke: a systematic  
567 review and meta-analysis. *SCIENTIFIC REPORTS*, 11(1), 11021. <https://doi.org/10.1038/s41598-021-89695-2>
- 569 Kroenke, K., Lucas, C. A., Rosenberg, M. L. et al. (1992). Causes of persistent dizziness. A  
570 prospective study of 100 patients in ambulatory care. *Annals of internal medicine*, 117(11), 898–  
571 904. <https://doi.org/10.7326/0003-4819-117-11-898>
- 572 Lammers, M. J. W., Young, E., Westerberg, B. D. et al. (2021). Risk of Stroke and Myocardial  
573 Infarction After Sudden Sensorineural Hearing Loss: A Meta-Analysis. *The Laryngoscope*, 131(6),  
574 1369–1377. <https://doi.org/10.1002/lary.29237>
- 575 Le Prell, C. G., Gagnon, P. M., Bennett, D. C. et al. (2011). Nutrient-enhanced diet reduces noise-  
576 induced damage to the inner ear and hearing loss. *Translational research : the journal of*  
577 *laboratory and clinical medicine*, 158(1), 38–53. <https://doi.org/10.1016/j.trsl.2011.02.006>
- 578 Lee, Y. Y., Choo, O.-S., Kim, Y. J. et al. (2020). Atorvastatin prevents hearing impairment in the  
579 presence of hyperlipidemia. *Biochimica et biophysica acta. Molecular cell research*, 1867(12),  
580 118850. <https://doi.org/10.1016/j.bbamcr.2020.118850>
- 581 Lin, F. R., Yaffe, K., Xia, J. et al. (2013). Hearing loss and cognitive decline in older adults. *JAMA*  
582 *internal medicine*, 173(4), 293–299. <https://doi.org/10.1001/jamainternmed.2013.1868>
- 583 Livingston, G., Huntley, J., Sommerlad, A. et al. (2020). Dementia prevention, intervention, and care:  
584 2020 report of the Lancet Commission. *Lancet (London, England)*, 396(10248), 413–446.  
585 [https://doi.org/10.1016/S0140-6736\(20\)30367-6](https://doi.org/10.1016/S0140-6736(20)30367-6)

- 586 Louza, J., Rösel, C., Gürkov, R. et al. (2019). Influence of Cochlear Implantation on Postural Control  
587 and Risk of Falls. *Audiology & neuro-otology*, 24(5), 245–252. <https://doi.org/10.1159/000503165>
- 588 Lubetzky, A. V., Gospodarek, M., Arie, L. et al. (2020). Auditory Input and Postural Control in  
589 Adults: A Narrative Review. *JAMA otolaryngology-- head & neck surgery*, 146(5), 480–487.  
590 <https://doi.org/10.1001/jamaoto.2020.0032>
- 591 Maudoux, A., Vitry, S., & El-Amraoui, A. (2022). Vestibular Deficits in Deafness: Clinical  
592 Presentation, Animal Modeling, and Treatment Solutions. *Frontiers in neurology*, 13, 816534.  
593 <https://doi.org/10.3389/fneur.2022.816534>
- 594 McCormack, A., Edmondson-Jones, M., Somerset, S. et al. (2016). A systematic review of the  
595 reporting of tinnitus prevalence and severity. *Hearing research*, 337, 70–79.  
596 <https://doi.org/10.1016/j.heares.2016.05.009>
- 597 Mick, P. T., Kabir, R., Pichora-Fuller, M. K. et al. (2023). Associations Between Cardiovascular Risk  
598 Factors and Audiometric Hearing: Findings From the Canadian Longitudinal Study on Aging. *EAR*  
599 *AND HEARING*. Advance online publication. <https://doi.org/10.1097/AUD.0000000000001370>
- 600 Murdin, L., & Schilder, A. G. M. (2015). Epidemiology of balance symptoms and disorders in the  
601 community: a systematic review. *OTOLOGY & NEUROTOLOGY*, 36(3), 387–392.  
602 <https://doi.org/10.1097/MAO.0000000000000691>
- 603 Nash, S. D., Cruickshanks, K. J., Klein, R. et al. (2011). The prevalence of hearing impairment and  
604 associated risk factors: the Beaver Dam Offspring Study. *Archives of otolaryngology--head & neck*  
605 *surgery*, 137(5), 432–439. <https://doi.org/10.1001/archoto.2011.15>
- 606 Negahban, H., Bavarsad Cheshmeh Ali, M., & Nassadj, G. (2017). Effect of hearing aids on static  
607 balance function in elderly with hearing loss. *Gait & posture*, 58, 126–129.  
608 <https://doi.org/10.1016/j.gaitpost.2017.07.112>
- 609 Neuhauser, H. K., Brevern, M. von, Radtke, A. et al. (2005). Epidemiology of vestibular vertigo: a  
610 neurotologic survey of the general population. *Neurology*, 65(6), 898–904.  
611 <https://doi.org/10.1212/01.wnl.0000175987.59991.3d>
- 612 Nondahl, D. M., Cruickshanks, K. J., Huang, G. H. et al. (2012). Generational Differences in the  
613 Reporting of Tinnitus. *EAR AND HEARING*, 33(5), 640–644.  
614 <https://doi.org/10.1097/AUD.0b013e31825069e8>
- 615 Orji, A., Kamenov, K., Dirac, M. et al. (2020). Global and regional needs, unmet needs and access to  
616 hearing aids. *INTERNATIONAL JOURNAL OF AUDIOLOGY*, 59(3), 166–172.  
617 <https://doi.org/10.1080/14992027.2020.1721577>
- 618 Palm, H.-G., Strobel, J., Achatz, G. et al. (2009). The role and interaction of visual and auditory  
619 afferents in postural stability. *Gait & posture*, 30(3), 328–333.  
620 <https://doi.org/10.1016/j.gaitpost.2009.05.023>
- 621 Paplou, V., Schubert, N. M. A., & Pyott, S. J. (2021). Age-Related Changes in the Cochlea and  
622 Vestibule: Shared Patterns and Processes. *Frontiers in neuroscience*, 15, 680856.  
623 <https://doi.org/10.3389/fnins.2021.680856>
- 624 Paquette, S. T., Dawes, R. P., Sundar, I. K. et al. (2018). Chronic cigarette smoke exposure drives  
625 spiral ganglion neuron loss in mice. *SCIENTIFIC REPORTS*, 8. <https://doi.org/10.1038/s41598-018-24166-9>
- 626
- 627 Rumalla, K., Karim, A. M., & Hullar, T. E. (2015). The effect of hearing aids on postural stability. *The*  
628 *Laryngoscope*, 125(3), 720–723. <https://doi.org/10.1002/lary.24974>
- 629 Samocha-Bonet, D., Wu, B., & Ryugo, D. K. (2021). Diabetes mellitus and hearing loss: A review.  
630 *Ageing research reviews*, 71, 101423. <https://doi.org/10.1016/j.arr.2021.101423>

- 631 Schipf, S., Alte, D., Völzke, H. et al. (2010). Prävalenz des Metabolischen Syndroms in Deutschland:  
632 Ergebnisse der Study of Health in Pomerania (SHIP). *Diabetologie und Stoffwechsel*, 5(03), 161–  
633 168. <https://doi.org/10.1055/s-0030-1247406>
- 634 Schmidt, C. O., Alte, D., Völzke, H. et al. (2011). Partial misspecification of survey design features  
635 sufficed to severely bias estimates of health-related outcomes. *Journal of clinical epidemiology*,  
636 64(4), 416–423. <https://doi.org/10.1016/j.jclinepi.2010.04.019>
- 637 Schubert, N. M. A., Roelofs, C. G., Free, R. H. et al. (2022). Age-related High-frequency Hearing  
638 Loss Is Not Associated With Horizontal Semicircular Canal Function. *EAR AND HEARING*, 43(6),  
639 1845–1852. <https://doi.org/10.1097/AUD.0000000000001252>
- 640 Seo, M., Lee, Y.-S., & Moon, S.-S. (2016). Association of hearing impairment with insulin resistance,  
641  $\beta$ -cell dysfunction and impaired fasting glucose before onset of diabetes. *DIABETIC MEDICINE*,  
642 33(9), 1275–1282. <https://doi.org/10.1111/dme.13096>
- 643 Sheffield, A. M., & Smith, R. J. H. (2019). The Epidemiology of Deafness. *Cold Spring Harbor*  
644 *perspectives in medicine*, 9(9). <https://doi.org/10.1101/cshperspect.a033258>
- 645 Sindhusake, D., Mitchell, P., Smith, W. et al. (2001). Validation of self-reported hearing loss. The  
646 Blue Mountains Hearing Study. *International journal of epidemiology*, 30(6), 1371–1378.  
647 <https://doi.org/10.1093/ije/30.6.1371>
- 648 Spankovich, C., & Le Prell, C. G. (2013). Healthy diets, healthy hearing: National Health and  
649 Nutrition Examination Survey, 1999-2002. *INTERNATIONAL JOURNAL OF AUDIOLOGY*,  
650 52(6), 369–376. <https://doi.org/10.3109/14992027.2013.780133>
- 651 Tseng, T.-H., Yeo, L.-X., Chen, W.-L. et al. (2022). Relationship between ideal cardiovascular health  
652 metrics and hearing loss: A 10-year retrospective cohort study. *Clinical otolaryngology : official*  
653 *journal of ENT-UK ; official journal of Netherlands Society for Oto-Rhino-Laryngology &*  
654 *Cervico-Facial Surgery*, 47(2), 304–312. <https://doi.org/10.1111/coa.13899>
- 655 Tsimpida, D., Kontopantelis, E., Ashcroft, D. et al. (2019). Socioeconomic and lifestyle factors  
656 associated with hearing loss in older adults: a cross-sectional study of the English Longitudinal  
657 Study of Ageing (ELSA). *BMJ OPEN*, 9(9), e031030. <https://doi.org/10.1136/bmjopen-2019-031030>
- 659 Uchida, Y., Sugiura, S., Nishita, Y. et al. (2019). Age-related hearing loss and cognitive decline - The  
660 potential mechanisms linking the two. *Auris, nasus, larynx*, 46(1), 1–9.  
661 <https://doi.org/10.1016/j.anl.2018.08.010>
- 662 Vitkovic, J., Le, C., Lee, S.-L. et al. (2016). The Contribution of Hearing and Hearing Loss to Balance  
663 Control. *Audiology & neuro-otology*, 21(4), 195–202. <https://doi.org/10.1159/000445100>
- 664 Völzke, H., Alte, D., Schmidt, C. O. et al. (2011). Cohort profile: the study of health in Pomerania.  
665 *International journal of epidemiology*, 40(2), 294–307. <https://doi.org/10.1093/ije/dyp394>
- 666 Völzke, H., Ittermann, T., Schmidt, C. O. et al. (2015). Prevalence trends in lifestyle-related risk  
667 factors. *Deutsches Arzteblatt international*, 112(11), 185–192.  
668 <https://doi.org/10.3238/arztebl.2015.0185>
- 669 Völzke, H., Schössow, J., Schmidt, C. O. et al. (2022). Cohort Profile Update: The Study of Health in  
670 Pomerania (SHIP). *International journal of epidemiology*, 51(6), e372-e383.  
671 <https://doi.org/10.1093/ije/dyac034>
- 672 Yamasoba, T., Lin, F. R., Someya, S. et al. (2013). Current concepts in age-related hearing loss:  
673 epidemiology and mechanistic pathways. *Hearing research*, 303, 30–38.  
674 <https://doi.org/10.1016/j.heares.2013.01.021>

It is made available under a [CC-BY 4.0 International license](#) .

*Ihler et al.*

*Prevalence of hearing and balance dysfunction*

- 675 Zhan, W., Cruickshanks, K. J., Klein, B. E. K. et al. (2011). Modifiable determinants of hearing  
676 impairment in adults. *Preventive medicine*, 53(4-5), 338–342.  
677 <https://doi.org/10.1016/j.ypmed.2011.08.012>
- 678 Zhong, X., & Yost, W. A. (2013). Relationship between postural stability and spatial hearing. *Journal*  
679 *of the American Academy of Audiology*, 24(9), 782–788. <https://doi.org/10.3766/jaaa.24.9.3>

680 **Tables**

681 Table 1: Characteristics of the study population stratified by grade 2 symptoms

|                                          | No grade 2 symptom | At least one grade 2 symptom | p*     |
|------------------------------------------|--------------------|------------------------------|--------|
| <b>Age; years</b>                        | 47 (35; 60)        | 60 (47; 70)                  | <0.001 |
| <b>Females</b>                           | 50.9%              | 50.5%                        | 0.735  |
| <b>Years of schooling</b>                |                    |                              | <0.001 |
| < 10 years                               | 25.1%              | 44.3%                        |        |
| 10 years                                 | 51.0%              | 40.4%                        |        |
| > 10 years                               | 23.9%              | 15.3%                        |        |
| <b>Smoking status</b>                    |                    |                              | <0.001 |
| Never                                    | 35.8%              | 36.5%                        |        |
| Former                                   | 32.8%              | 40.9%                        |        |
| Current                                  | 31.4%              | 22.6%                        |        |
| <b>Alcohol consumption; g/day</b>        | 5.05 (1.30; 13.4)  | 3.59 (0.65; 11.5)            | <0.001 |
| <b>Body mass index; kg/m<sup>2</sup></b> | 26.8 (23.7; 30.2)  | 27.8 (24.7; 31.0)            | <0.001 |
| <b>Waist circumference; cm</b>           | 89 (79; 99)        | 93 (82; 102)                 | <0.001 |
| <b>Myocardial infarction</b>             | 2.1%               | 5.6%                         | <0.001 |
| <b>Stroke</b>                            | 1.4%               | 4.2%                         | <0.001 |
| <b>Glucose; mmol/L</b>                   | 5.3 (4.9; 5.8)     | 5.4 (5.0; 6.1)               | <0.001 |
| <b>HbA1c; %</b>                          | 5.2 (4.8; 5.6)     | 5.4 (5.0; 5.9)               | <0.001 |
| <b>Type 2 diabetes</b>                   | 6.9%               | 13.6%                        | <0.001 |
| <b>Total cholesterol; mmol/L</b>         | 5.3 (4.6; 6.1)     | 5.4 (4.7; 6.2)               | 0.024  |
| <b>HDL-cholesterol; mmol/L</b>           | 1.33 (1.09; 1.60)  | 1.30 (1.06; 1.58)            | 0.009  |
| <b>LDL-cholesterol; mmol/L</b>           | 3.3 (2.6; 3.9)     | 3.3 (2.7; 4.0)               | 0.102  |
| <b>Triglycerides; mmol/L</b>             | 1.40 (0.97; 2.05)  | 1.54 (1.10; 2.24)            | <0.001 |
| <b>Dyslipidemia</b>                      | 17.6%              | 30.5%                        | <0.001 |
| <b>Arterial hypertension</b>             | 44.8%              | 60.0%                        | <0.001 |

682 Continuous data are expressed as median, 25<sup>th</sup> and 75<sup>th</sup> percentile; categorical data as percentage.

683 \*: Mann-Whitney-U test (continuous data) or  $\chi^2$ -test (categorical data).



684 Table 2: Association of behavioural and metabolic markers with audiovestibular symptoms

|                                          | <b>Hearing loss</b><br>Odds ratio (95%-CI) | <b>Tinnitus</b><br>Odds ratio (95%-CI) | <b>Dizziness</b><br>Odds ratio (95%-CI) | <b>Grade 2 symptom</b><br>Odds ratio (95%-CI) |
|------------------------------------------|--------------------------------------------|----------------------------------------|-----------------------------------------|-----------------------------------------------|
| <b>Education (Years of schooling)</b>    |                                            |                                        |                                         |                                               |
| <b>10 years vs. &lt;10 years</b>         | 0.85 (0.71; 1.03)                          | 0.93 (0.75; 1.15)                      | 0.76 (0.63; 0.92)*                      | 0.82 (0.71; 0.95)*                            |
| <b>&gt;10years vs. &lt;10 years</b>      | 0.57 (0.46; 0.72)*                         | 0.79 (0.61; 1.01)                      | 0.48 (0.38; 0.62)*                      | 0.55 (0.46; 0.65)*                            |
| <b>Smoking status</b>                    |                                            |                                        |                                         |                                               |
| <b>Former vs. never</b>                  | 1.27 (1.06; 1.52)*                         | 1.24 (1.01; 1.53)*                     | 1.24 (1.04; 1.48)*                      | 1.30 (1.13; 1.48)*                            |
| <b>Current vs. never</b>                 | 1.22 (0.99; 1.50)                          | 1.09 (0.87; 1.37)                      | 1.05 (0.87; 1.29)                       | 1.19 (1.03; 1.38)*                            |
| <b>Alcohol consumption; g/day</b>        | 1.06 (0.98; 1.14)                          | 1.03 (0.95; 1.12)                      | 0.89 (0.78; 1.01)                       | 1.01 (0.95; 1.08)                             |
| <b>Body mass index; kg/m<sup>2</sup></b> | 1.03 (0.96; 1.11)                          | 1.00 (0.92; 1.09)                      | 1.04 (0.97; 1.12)                       | 1.00 (0.94; 1.06)                             |
| <b>Waist circumference; cm</b>           | 1.08 (0.99; 1.17)                          | 1.02 (0.92; 1.12)                      | 1.07 (0.98; 1.17)                       | 1.02 (0.96; 1.10)                             |
| <b>Glucose; mmol/L</b>                   | 1.07 (1.00; 1.14)*                         | 1.05 (0.96; 1.14)                      | 1.05 (0.97; 1.13)                       | 1.05 (0.99; 1.11)                             |
| <b>HbA1c; %</b>                          | 1.07 (0.99; 1.15)                          | 1.03 (0.94; 1.13)                      | 1.10 (1.02; 1.18)*                      | 1.08 (1.02; 1.15)*                            |
| <b>Type 2 diabetes</b>                   | 1.37 (1.10; 1.72)*                         | 1.14 (0.86; 1.49)                      | 1.48 (1.16; 1.88)*                      | 1.35 (1.12; 1.64)*                            |
| <b>Total cholesterol; mmol/L</b>         | 0.98 (0.90; 1.06)                          | 1.03 (0.95; 1.13)                      | 0.94 (0.86; 1.02)                       | 0.96 (0.90; 1.01)                             |
| <b>HDL-cholesterol; mmol/L</b>           | 0.98 (0.89; 1.07)                          | 0.97 (0.89; 1.07)                      | 0.91 (0.84; 0.99)*                      | 0.97 (0.91; 1.04)                             |
| <b>LDL-cholesterol; mmol/L</b>           | 0.95 (0.88; 1.03)                          | 1.04 (0.95; 1.13)                      | 0.95 (0.88; 1.03)                       | 0.94 (0.88; 0.99)*                            |
| <b>Triglycerides; mmol/L</b>             | 1.11 (1.02; 1.20)*                         | 1.03 (0.95; 1.11)                      | 1.09 (1.01; 1.18)*                      | 1.09 (1.02; 1.16)*                            |
| <b>Dyslipidemia</b>                      | 1.17 (0.99; 1.39)                          | 1.22 (0.99; 1.49)                      | 1.46 (1.22; 1.75)*                      | 1.33 (1.16; 1.53)*                            |
| <b>Arterial hypertension</b>             | 1.23 (1.04; 1.45)*                         | 1.04 (0.86; 1.25)                      | 1.12 (0.94; 1.32)                       | 1.13 (0.99; 1.28)                             |

685 Data are derived from logistic regression models adjusted for age and gender. Continuous exposure were standardized. CI: confidence interval.

686 \*: p&lt;0.05.



687 **Figure Legends**

688 Figure 1: Prevalence of audiovestibular symptoms.

689 A: individual and multiple symptoms (absolute numbers and share from total study population, n =  
690 8134), B: weighted prevalence, individual and any grade-2-symptom.

691 Figure 2: Prevalence by age group and sex.

692 A: female, B: male.

693 Figure 3: Age-adjusted associations of education and smoking status with audiovestibular symptoms  
694 stratified by sex.

695 A, C female, B, D male; A, B education, C, D smoking. Odds ratio (95%-CI).

It is made available under a [CC-BY 4.0 International license](#) .

*Ihler et al.*

*Prevalence of hearing and balance dysfunction*

696 **Supplement**

697 Supplemental Table 1: Phrasing and grading of primary outcome measures

698 Supplemental Table 2: Excluded participants and analyzed population

# Figure 1

A

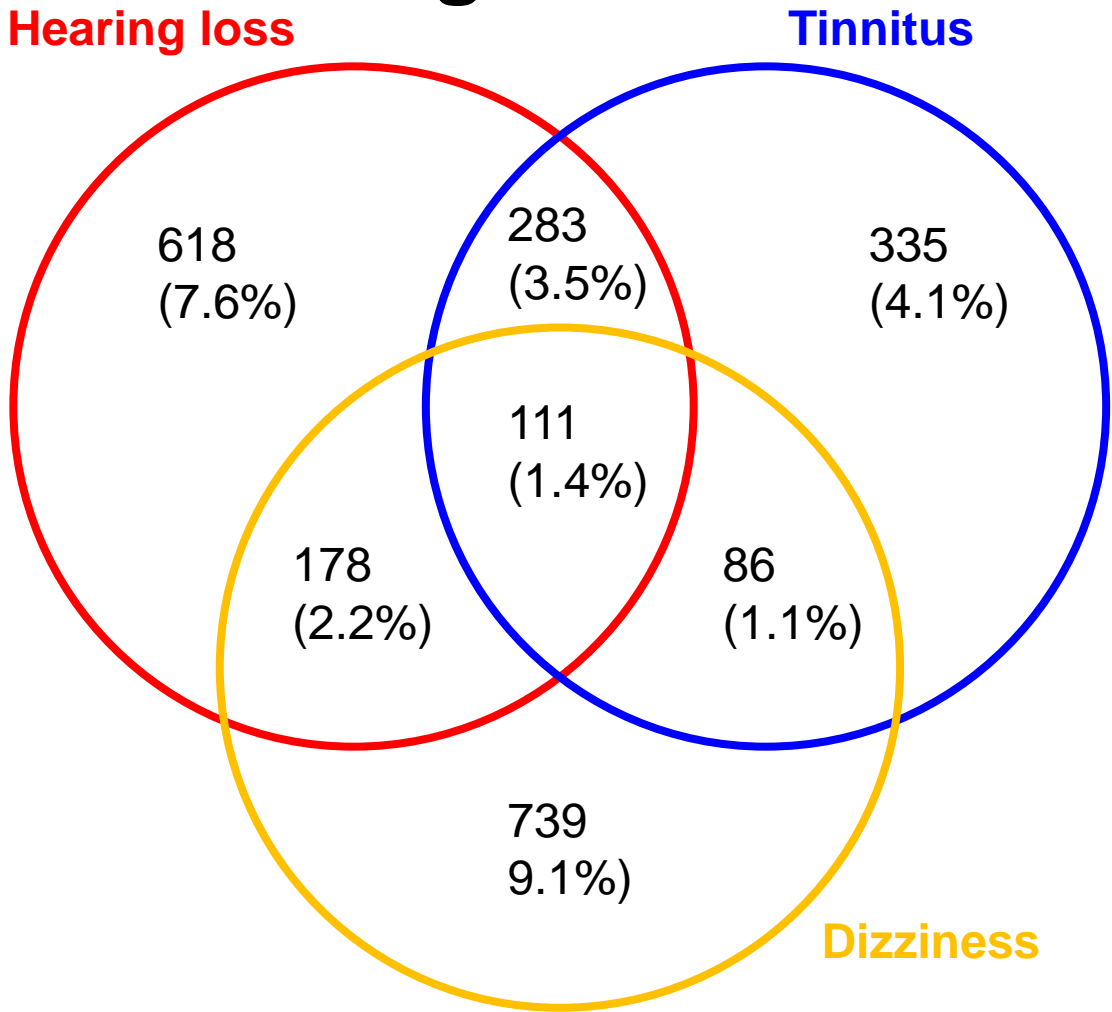

B

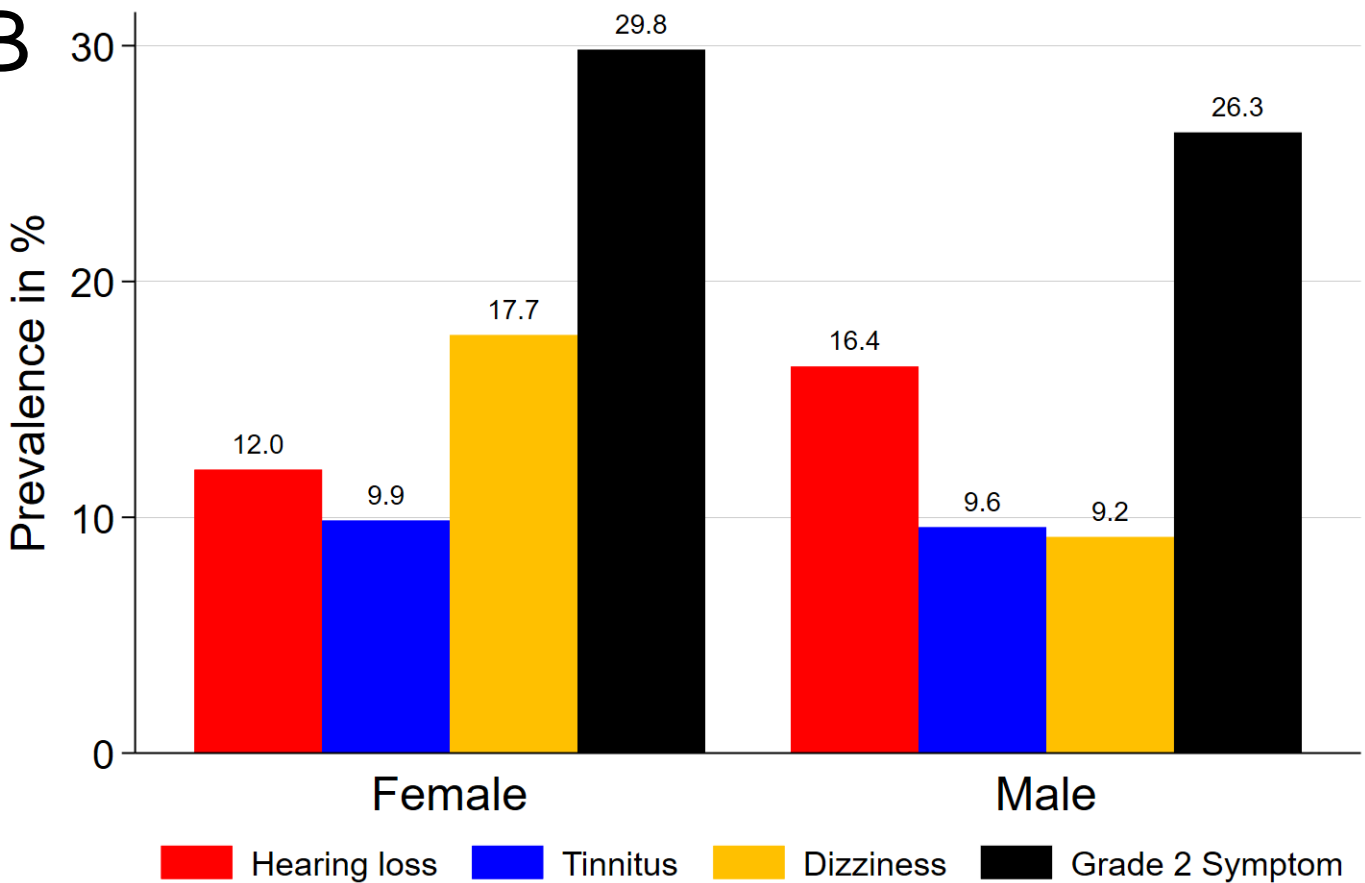

# Figure 2

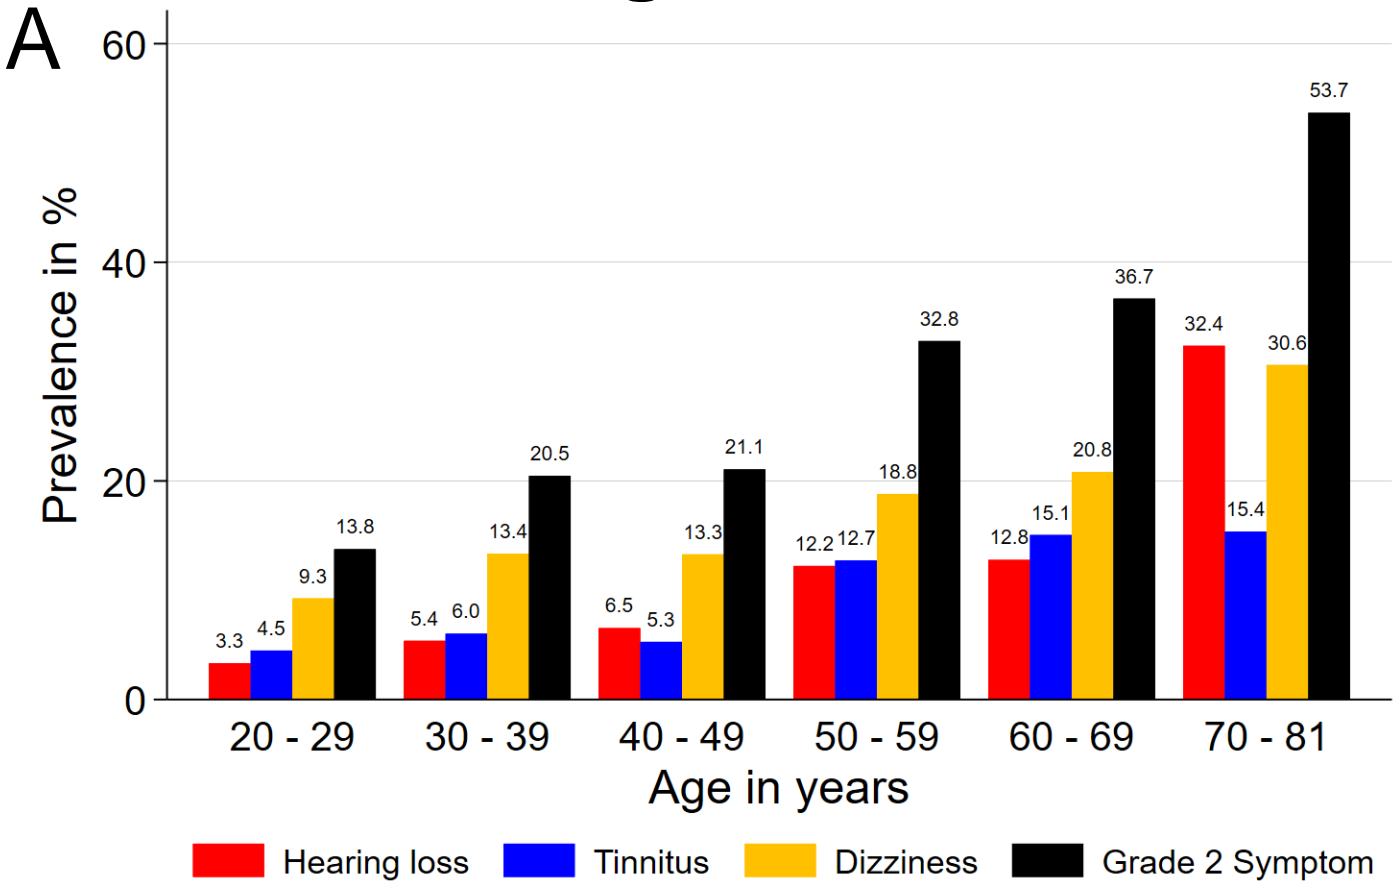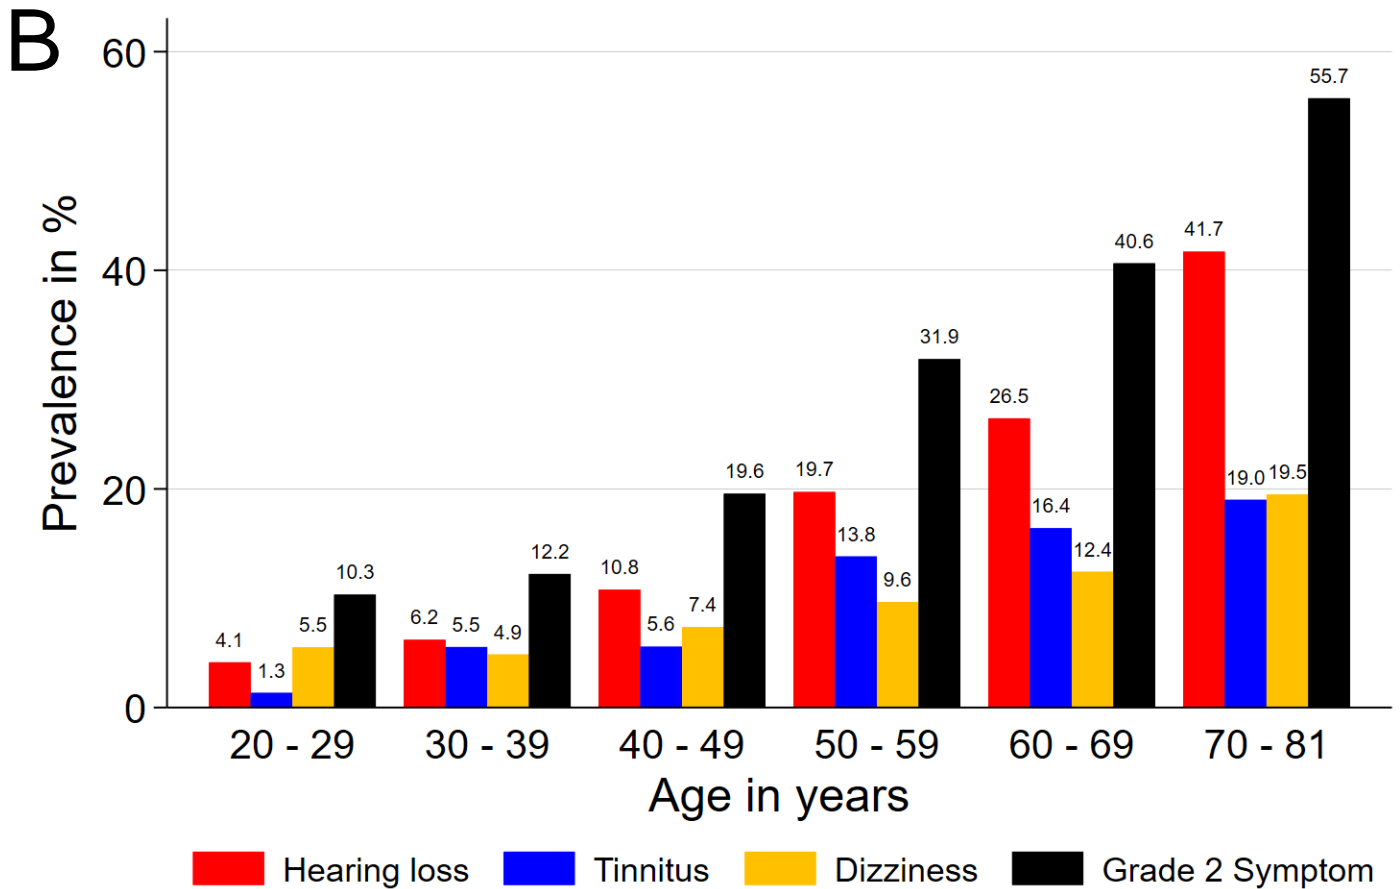

# Figure 3

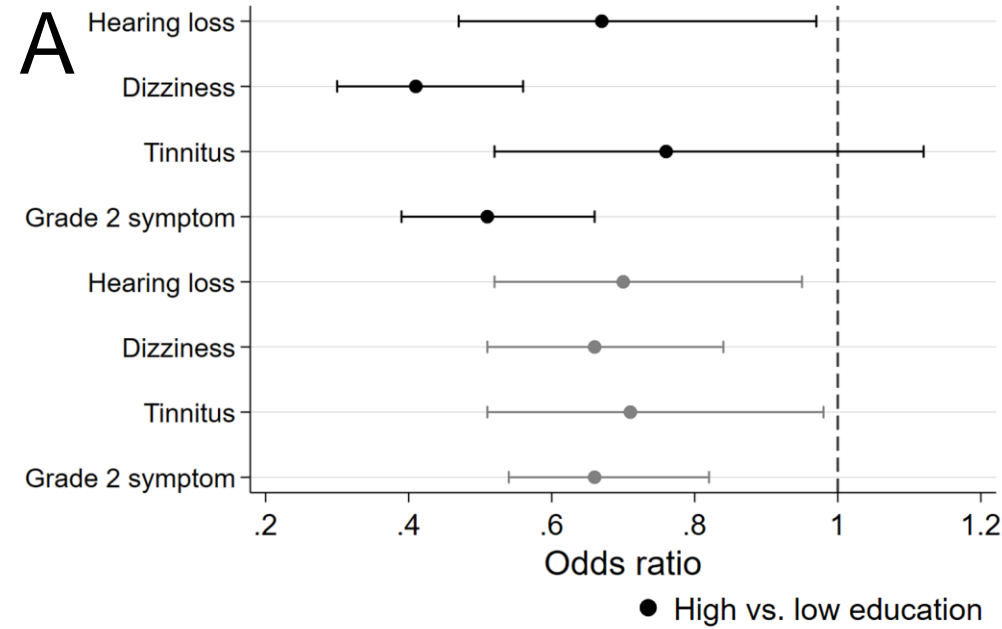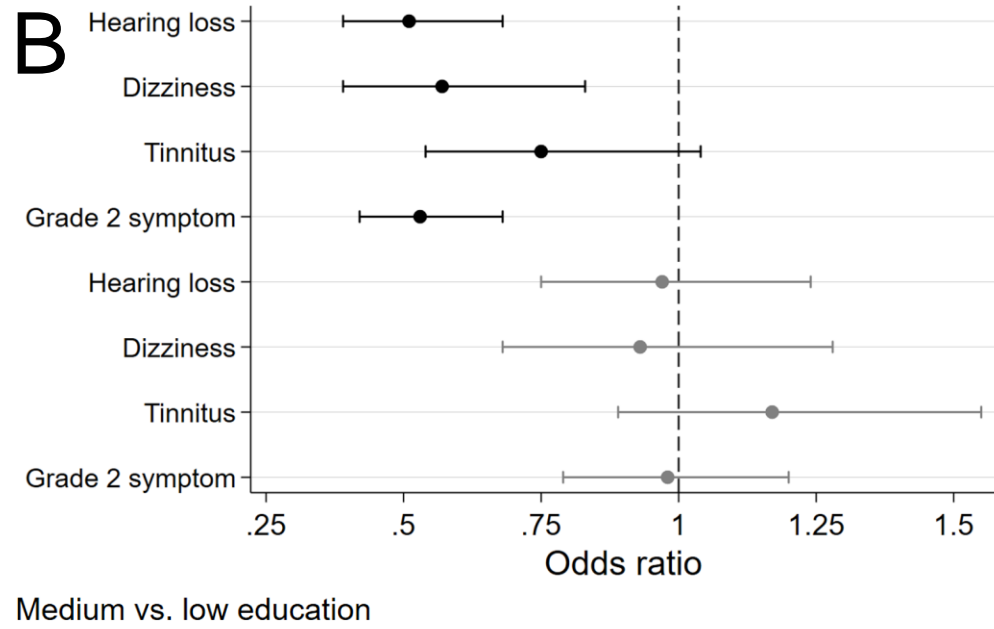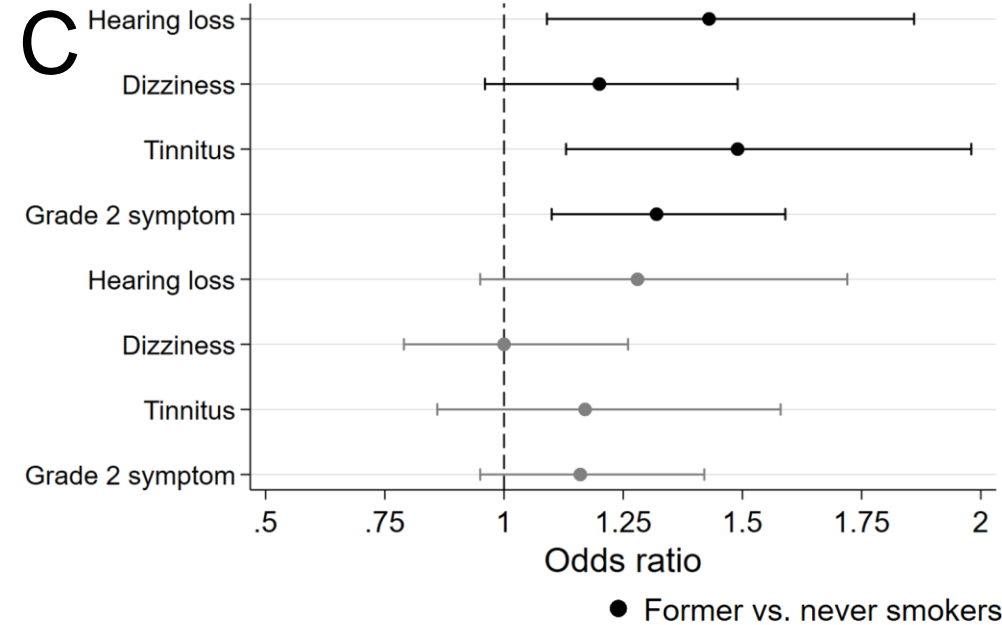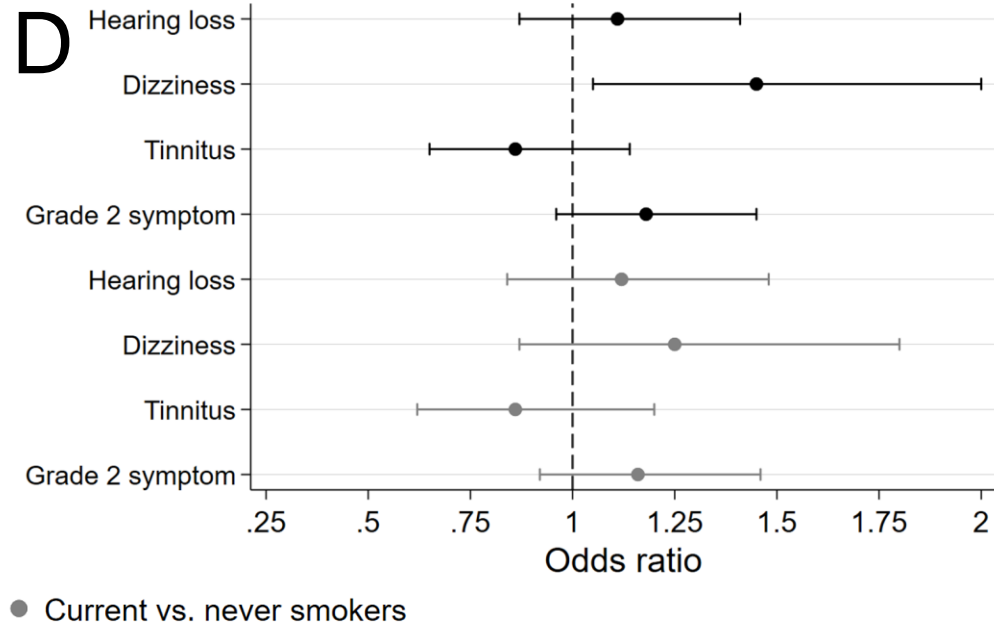

Source: https://medrxiv.org/content/10.1101/2023.08.17.23293690.full.pdf
